# Supplementary material for: MR imaging and targeting of human breast cancer cells with folate decorated nanoparticles
Source: Royal Society of Chemistry journal article supplement (doi:10.1039/c5ra04880j), 2015-01-01
Supplement: c5ra04880j1.pdf [file c5ra04880j1.pdf]

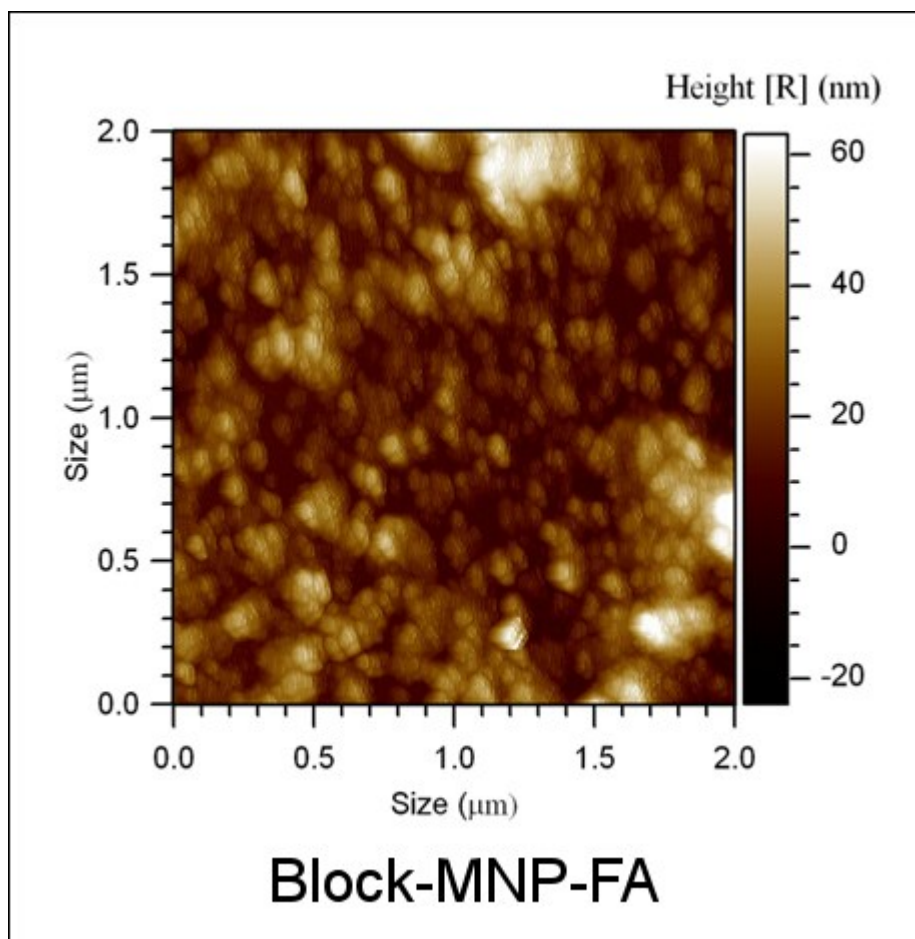

**Figure S11.** Topography AFM images of magnetite loaded and targeted NPs (Block-MNP-FA)

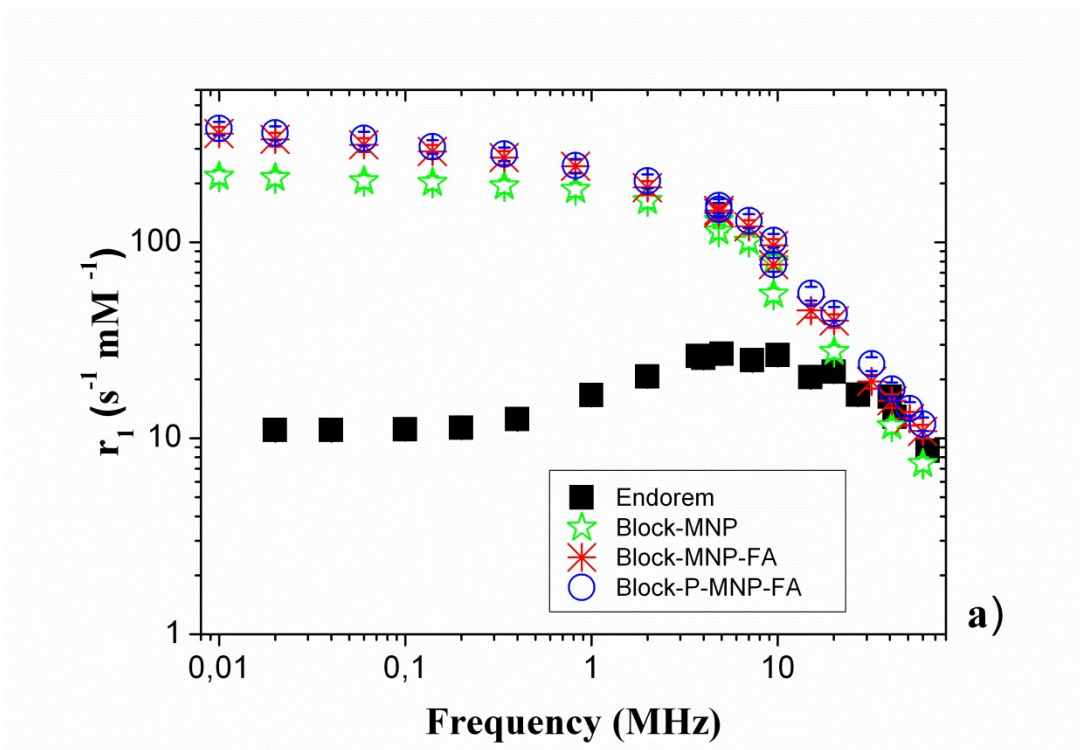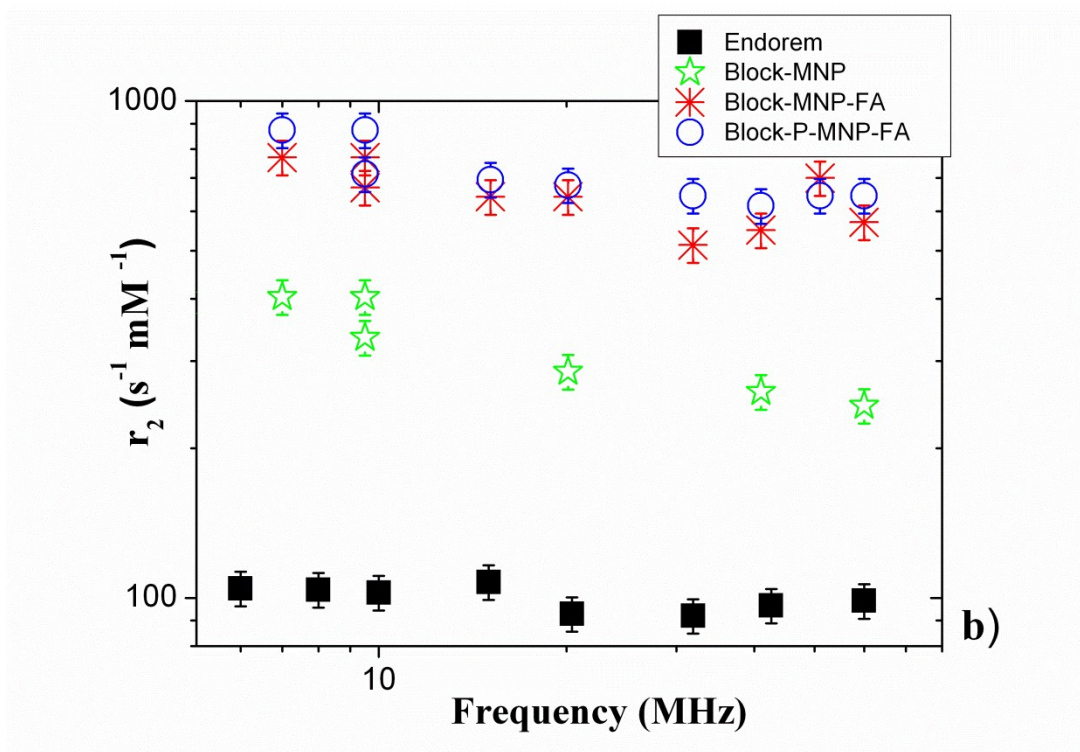

**Figure SI2.** Longitudinal ( $r_1$ ) and Transverse ( $r_2$ ) relaxivities ( $L \cdot \text{mmol}^{-1} \cdot \text{sec}^{-1}$ ) of Block-MNP, Block-MNP-FA and Block-P-MNP-FA samples compared to Endorem<sup>®</sup>
